# Supplementary material for: Krempfielins N–P, New Anti-Inflammatory Eunicellins from a Taiwanese Soft Coral Cladiella krempfi
Source: Mar Drugs. 2014 Feb 21;12(2):1148–56. doi: 10.3390/md12021148 (PMC3944535; doi:10.3390/md12021148)

## Supplementary Information

Figure S1.  $^1\text{H}$  NMR spectrum of **1** in  $\text{CDCl}_3$  at 400 MHz.

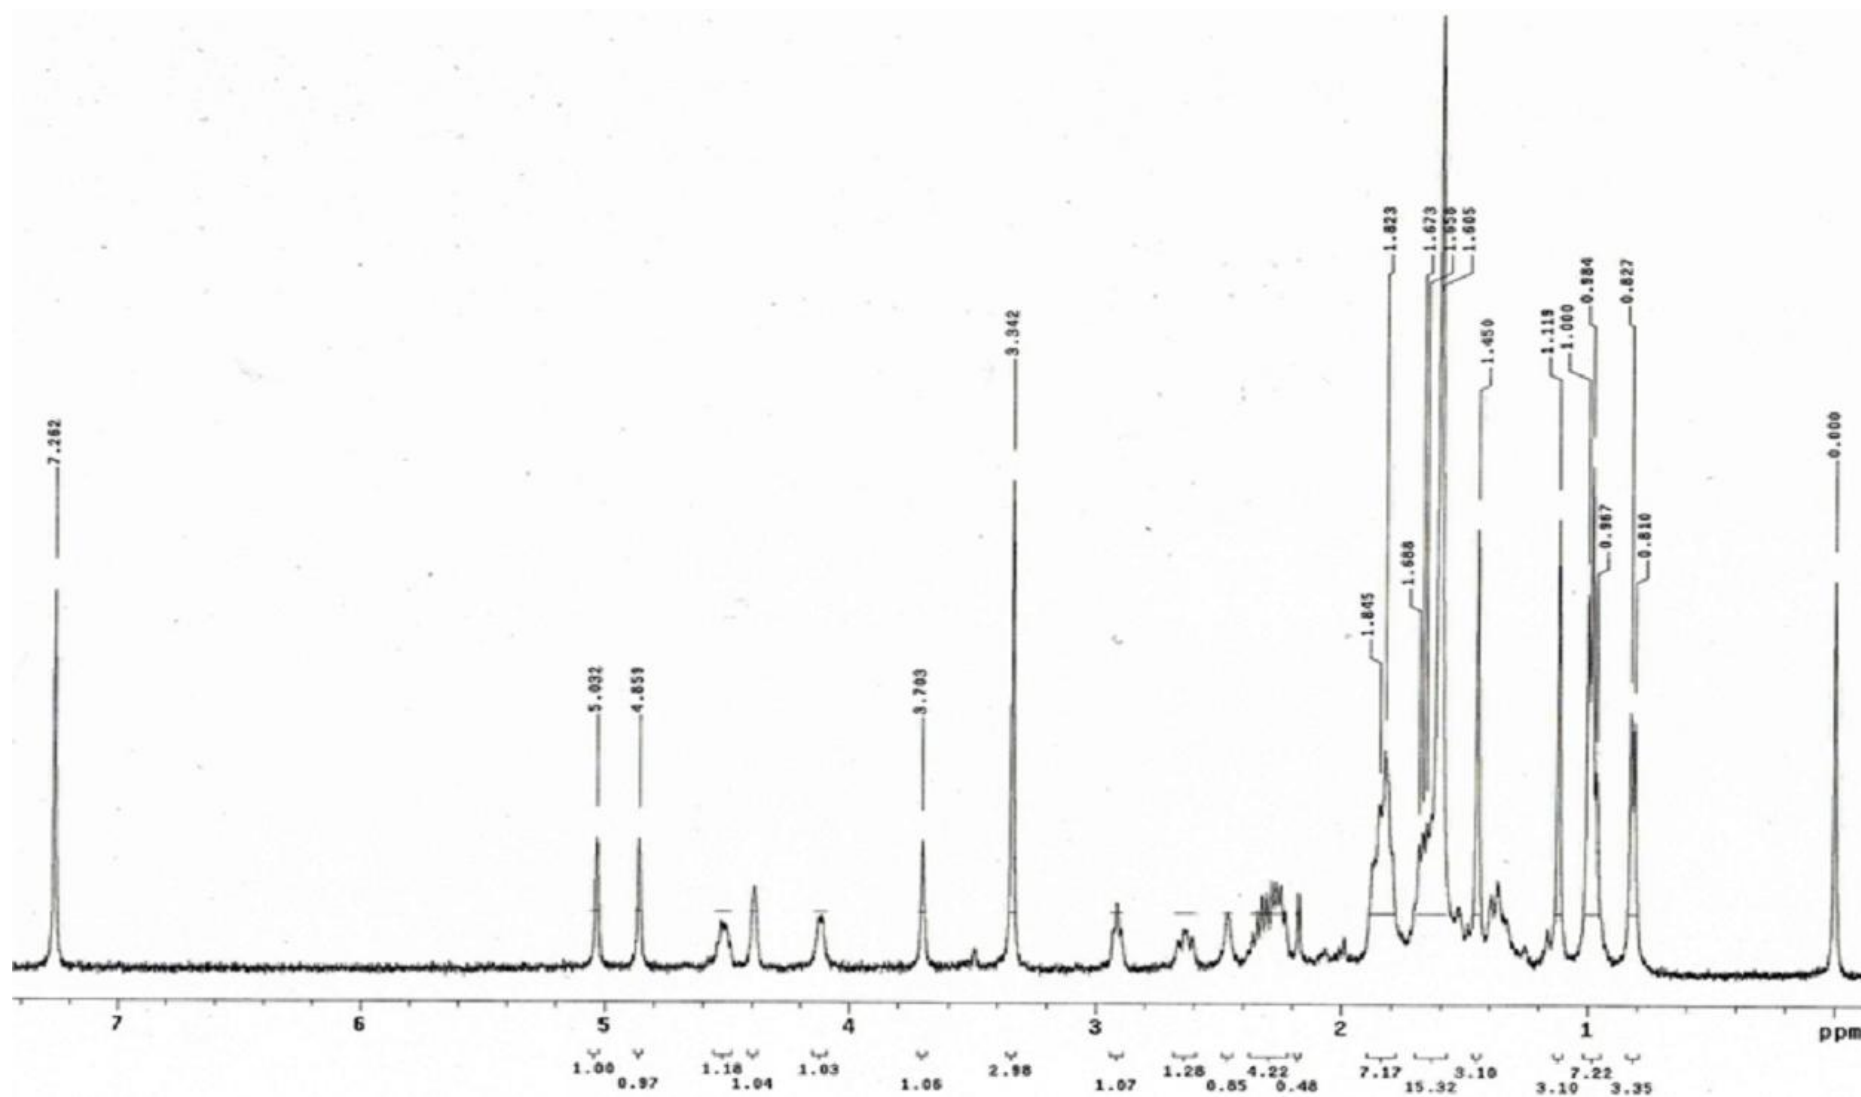

**Figure S2.**  $^{13}\text{C}$  NMR spectrum of **1** in  $\text{CDCl}_3$  at 100 MHz.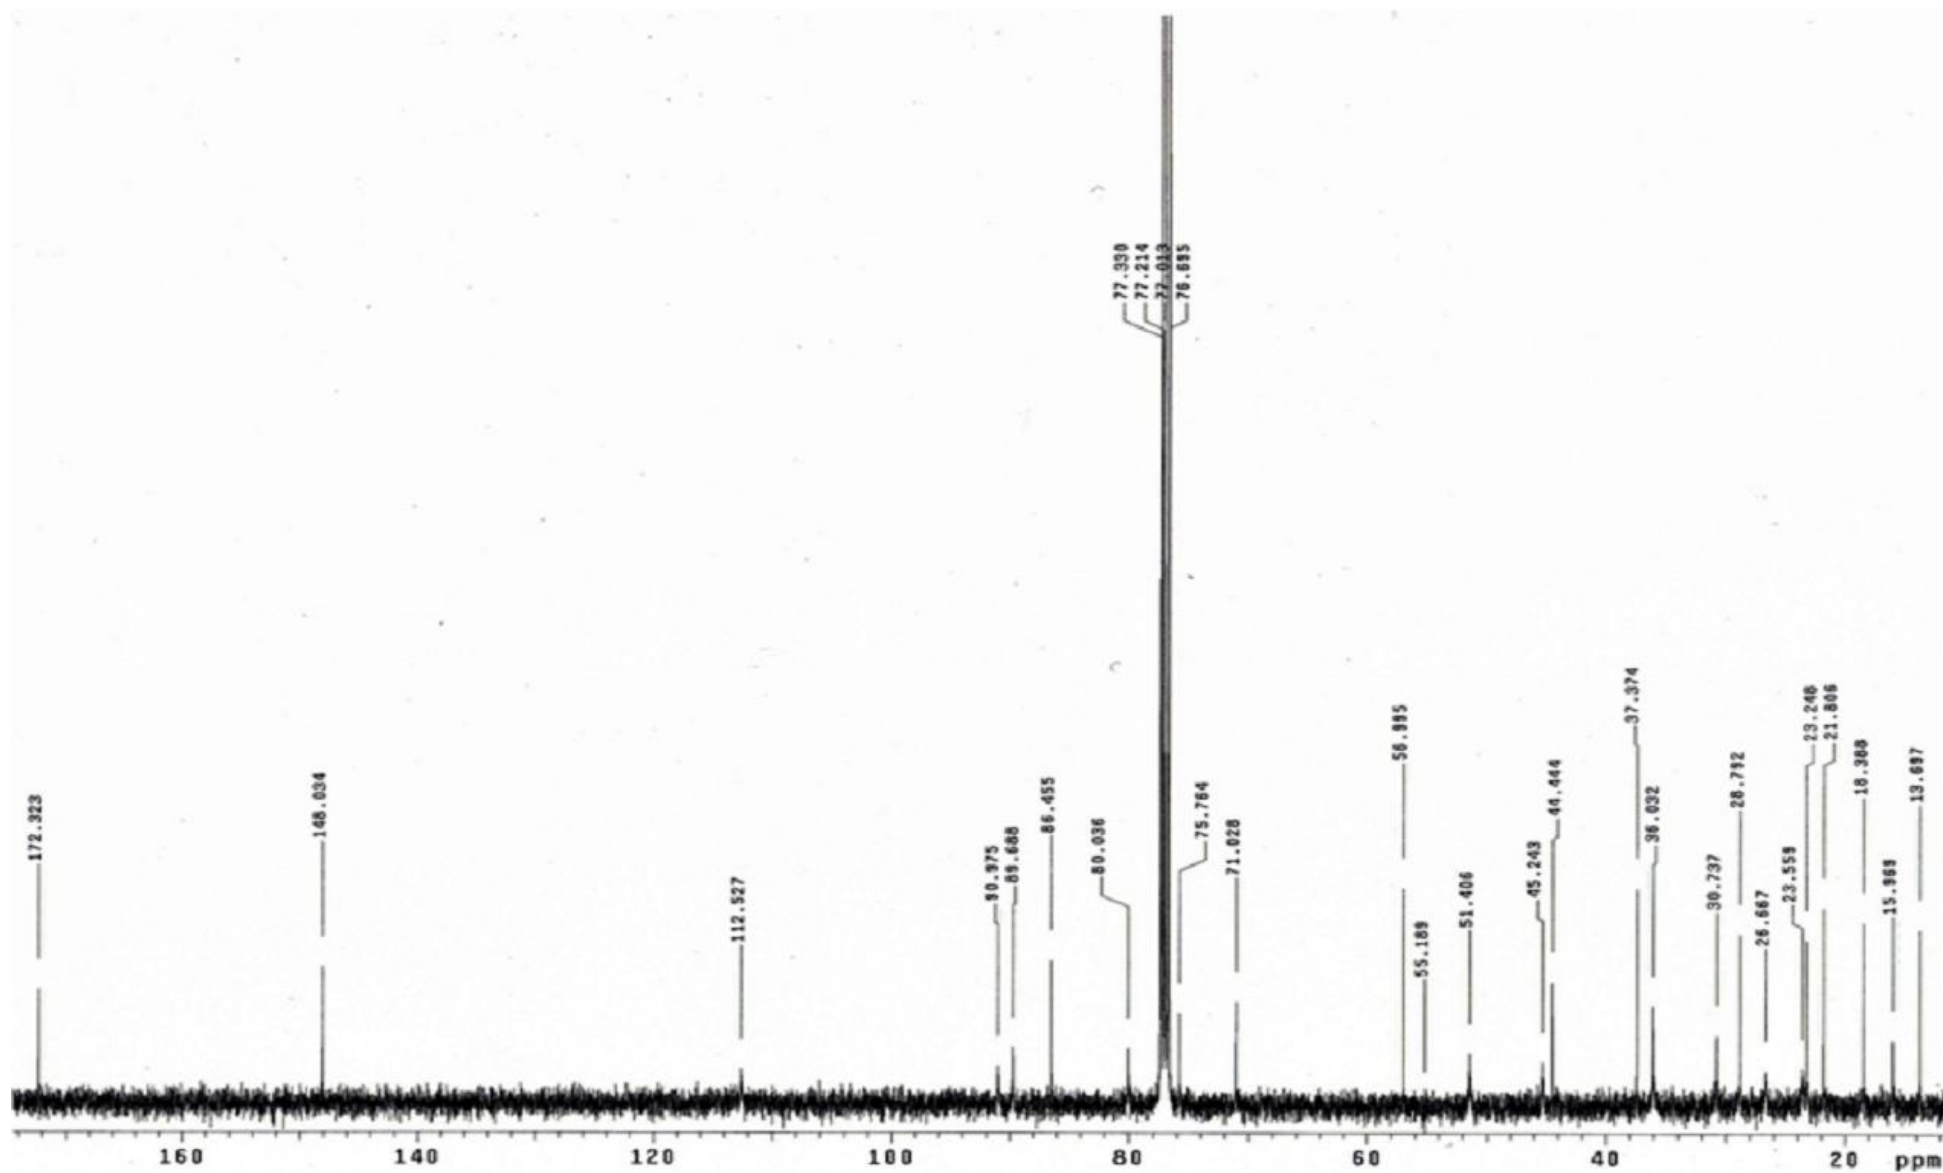

**Figure S3.** HRESIMS spectrum of **1**.

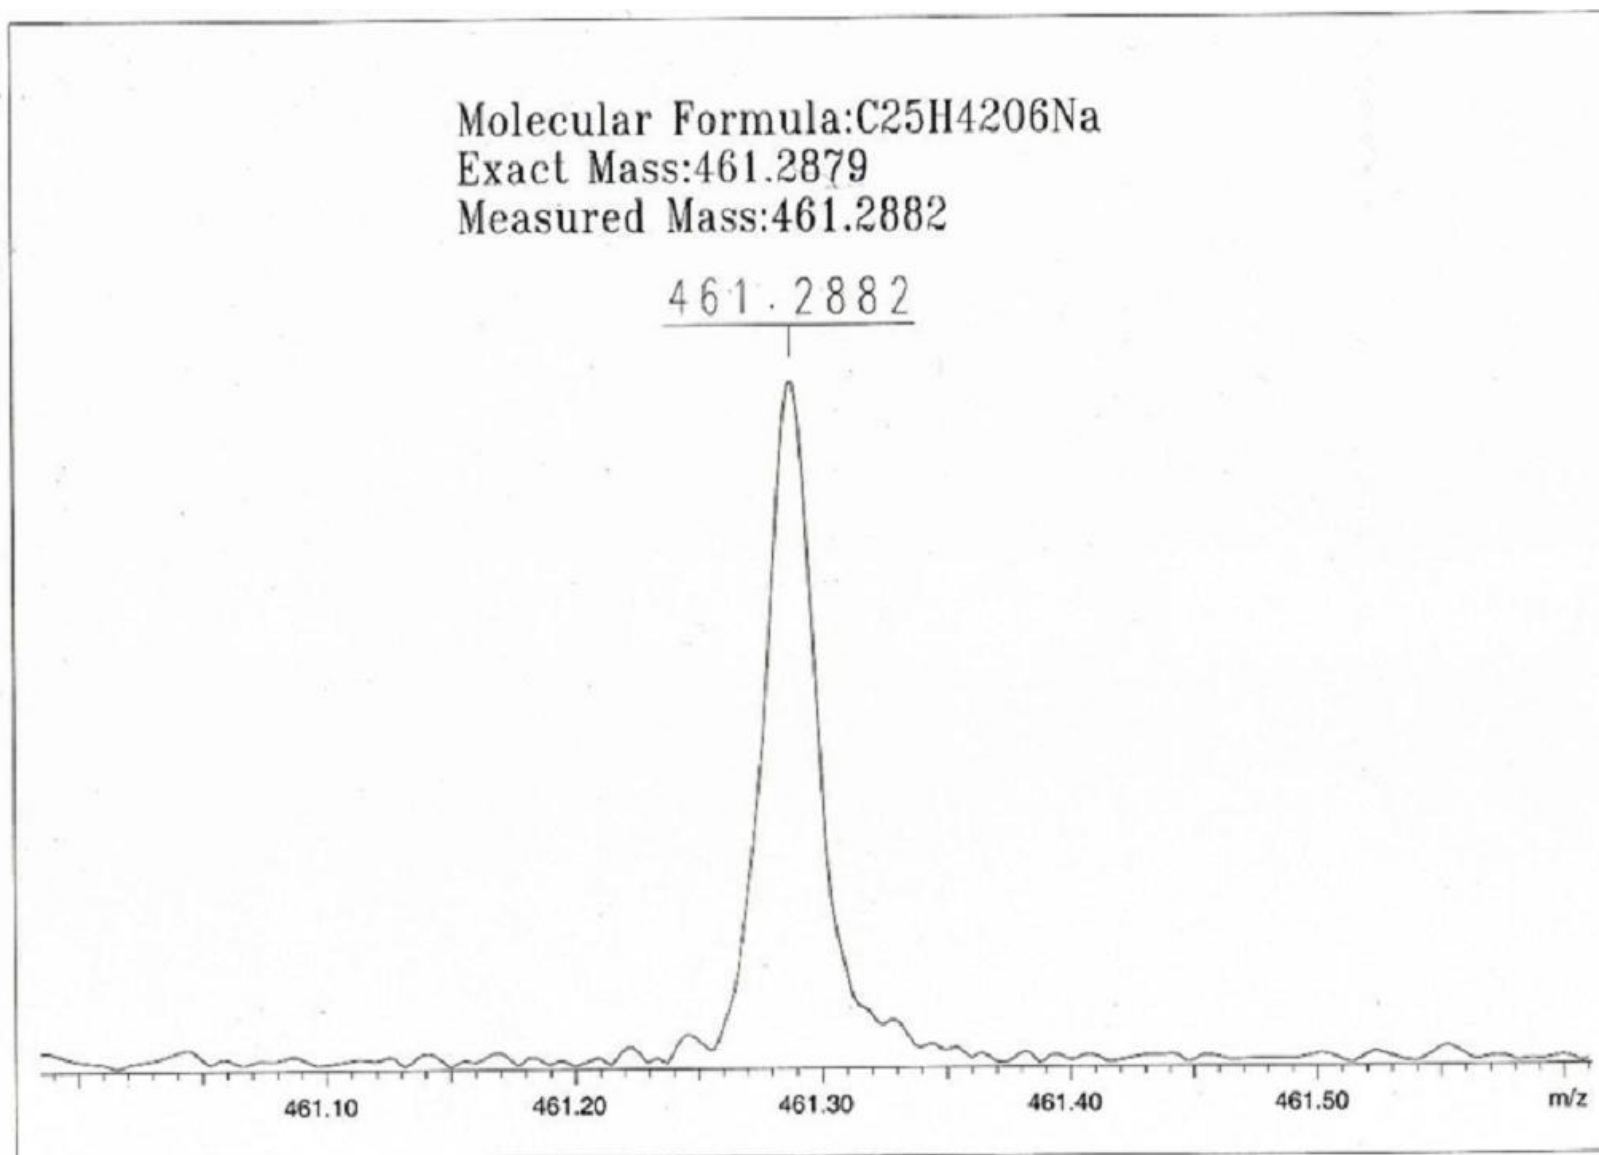

**Figure S4.**  $^1\text{H}$  NMR spectrum of **2** in  $\text{CDCl}_3$  at 500 MHz.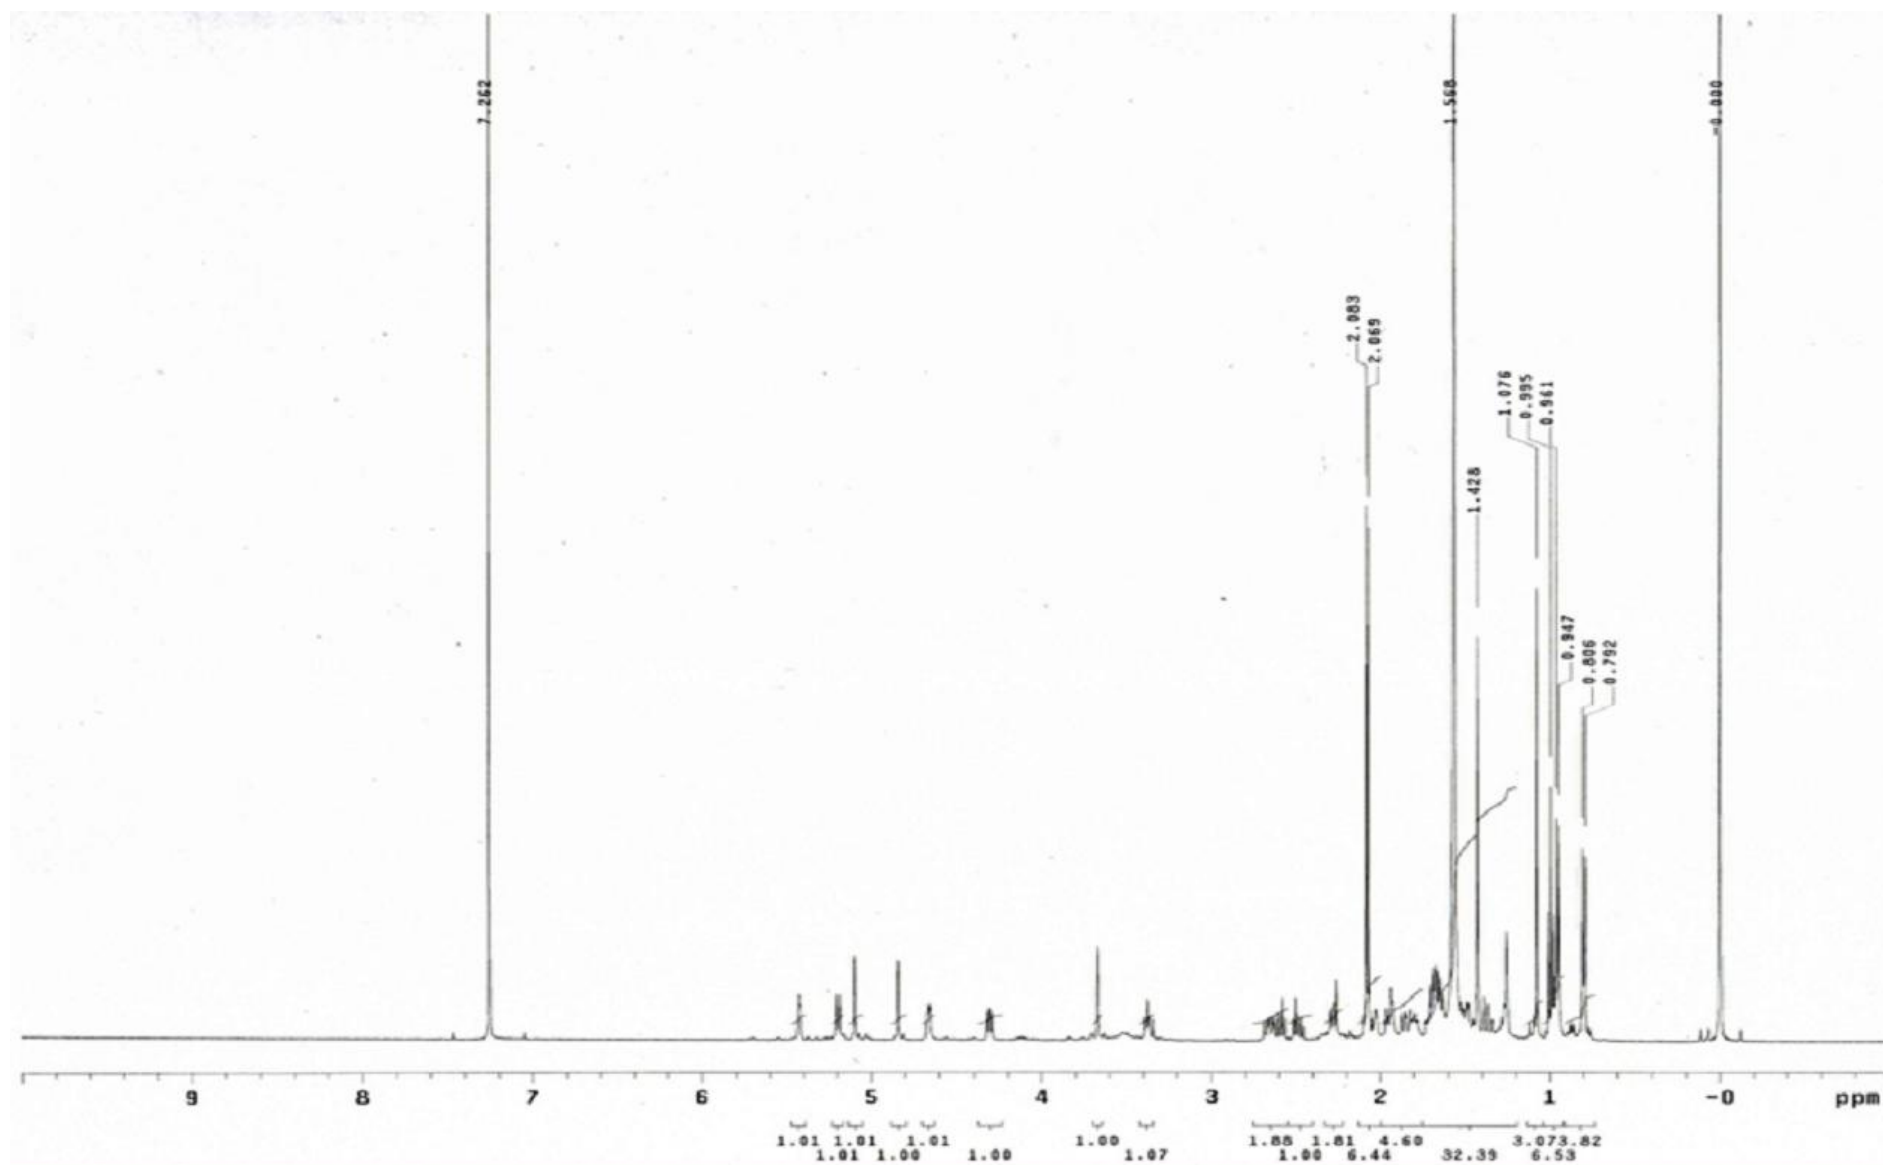

**Figure S5.**  $^{13}\text{C}$  NMR spectrum of **2** in  $\text{CDCl}_3$  at 125 MHz.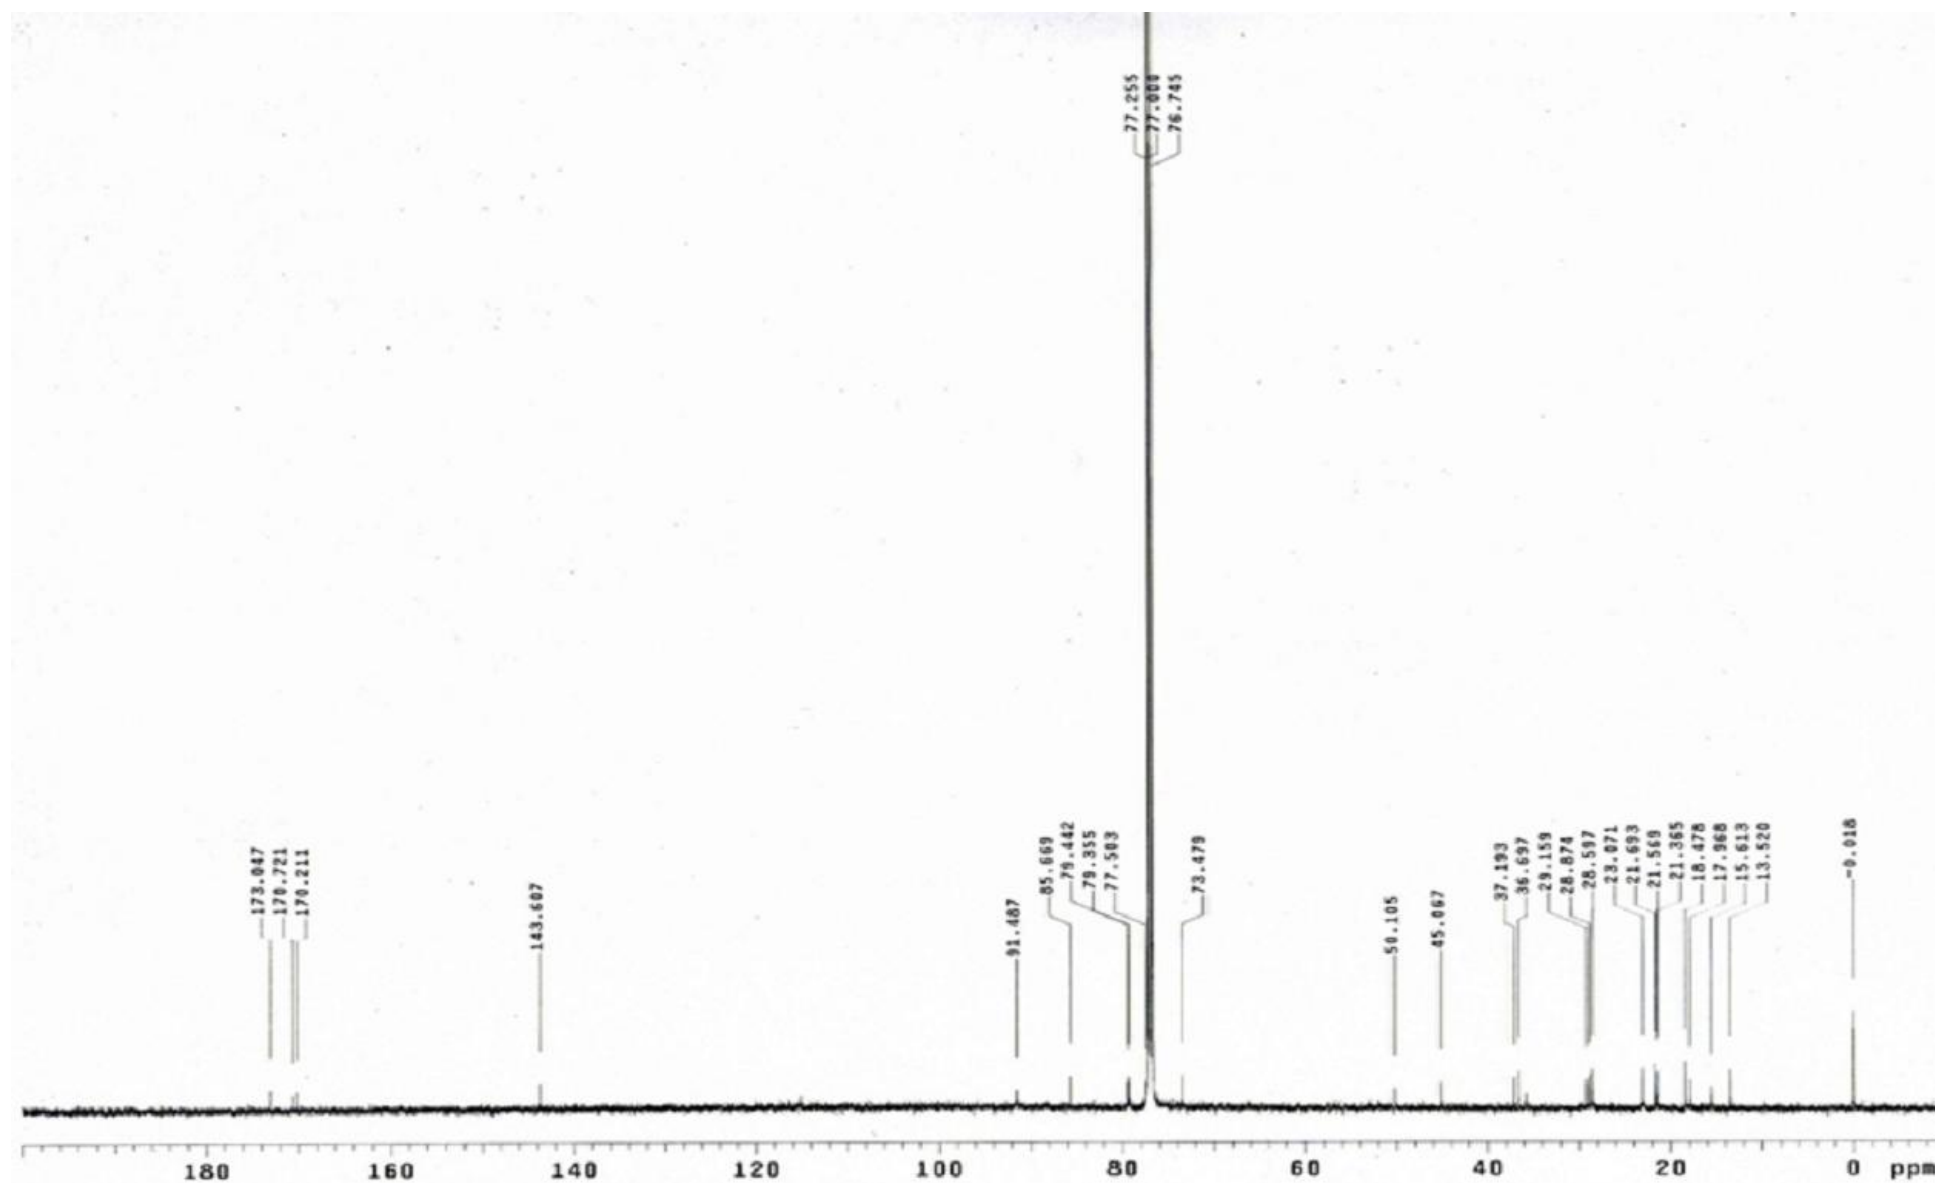

**Figure S6.** HRESIMS spectrum of **2**.

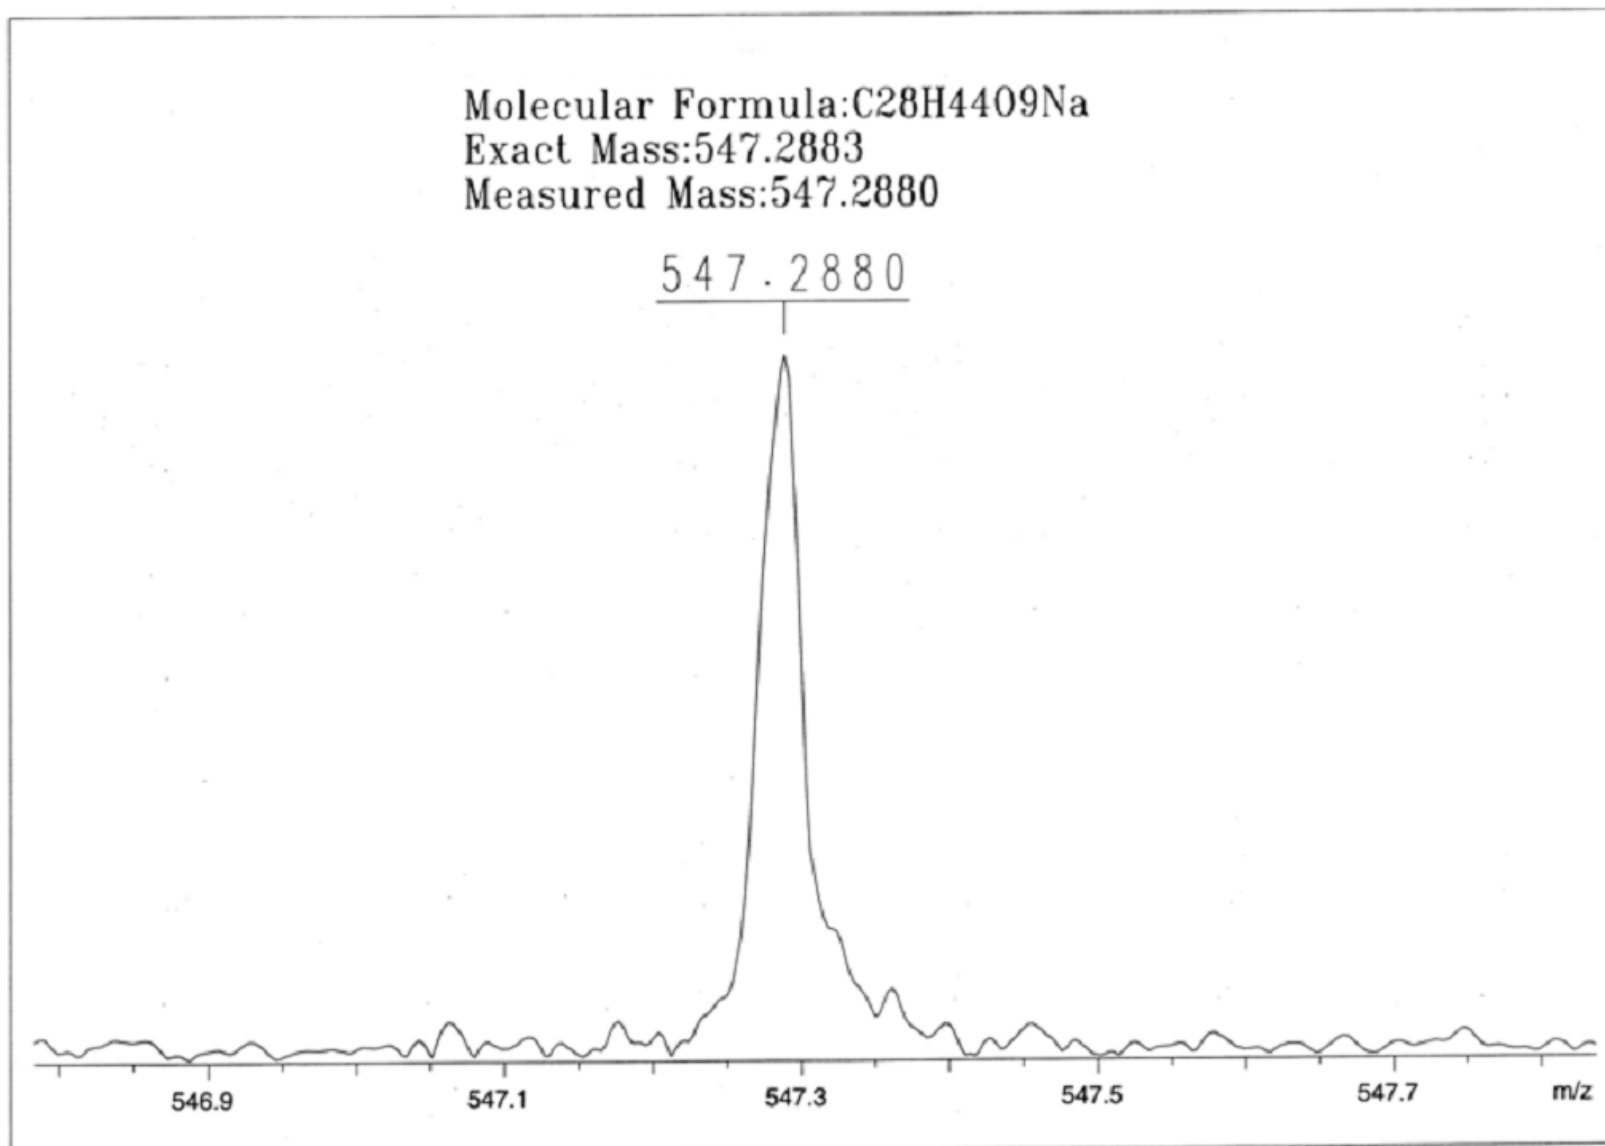

**Figure S7.**  $^1\text{H}$  NMR spectrum of **3** in  $\text{CDCl}_3$  at 400 MHz.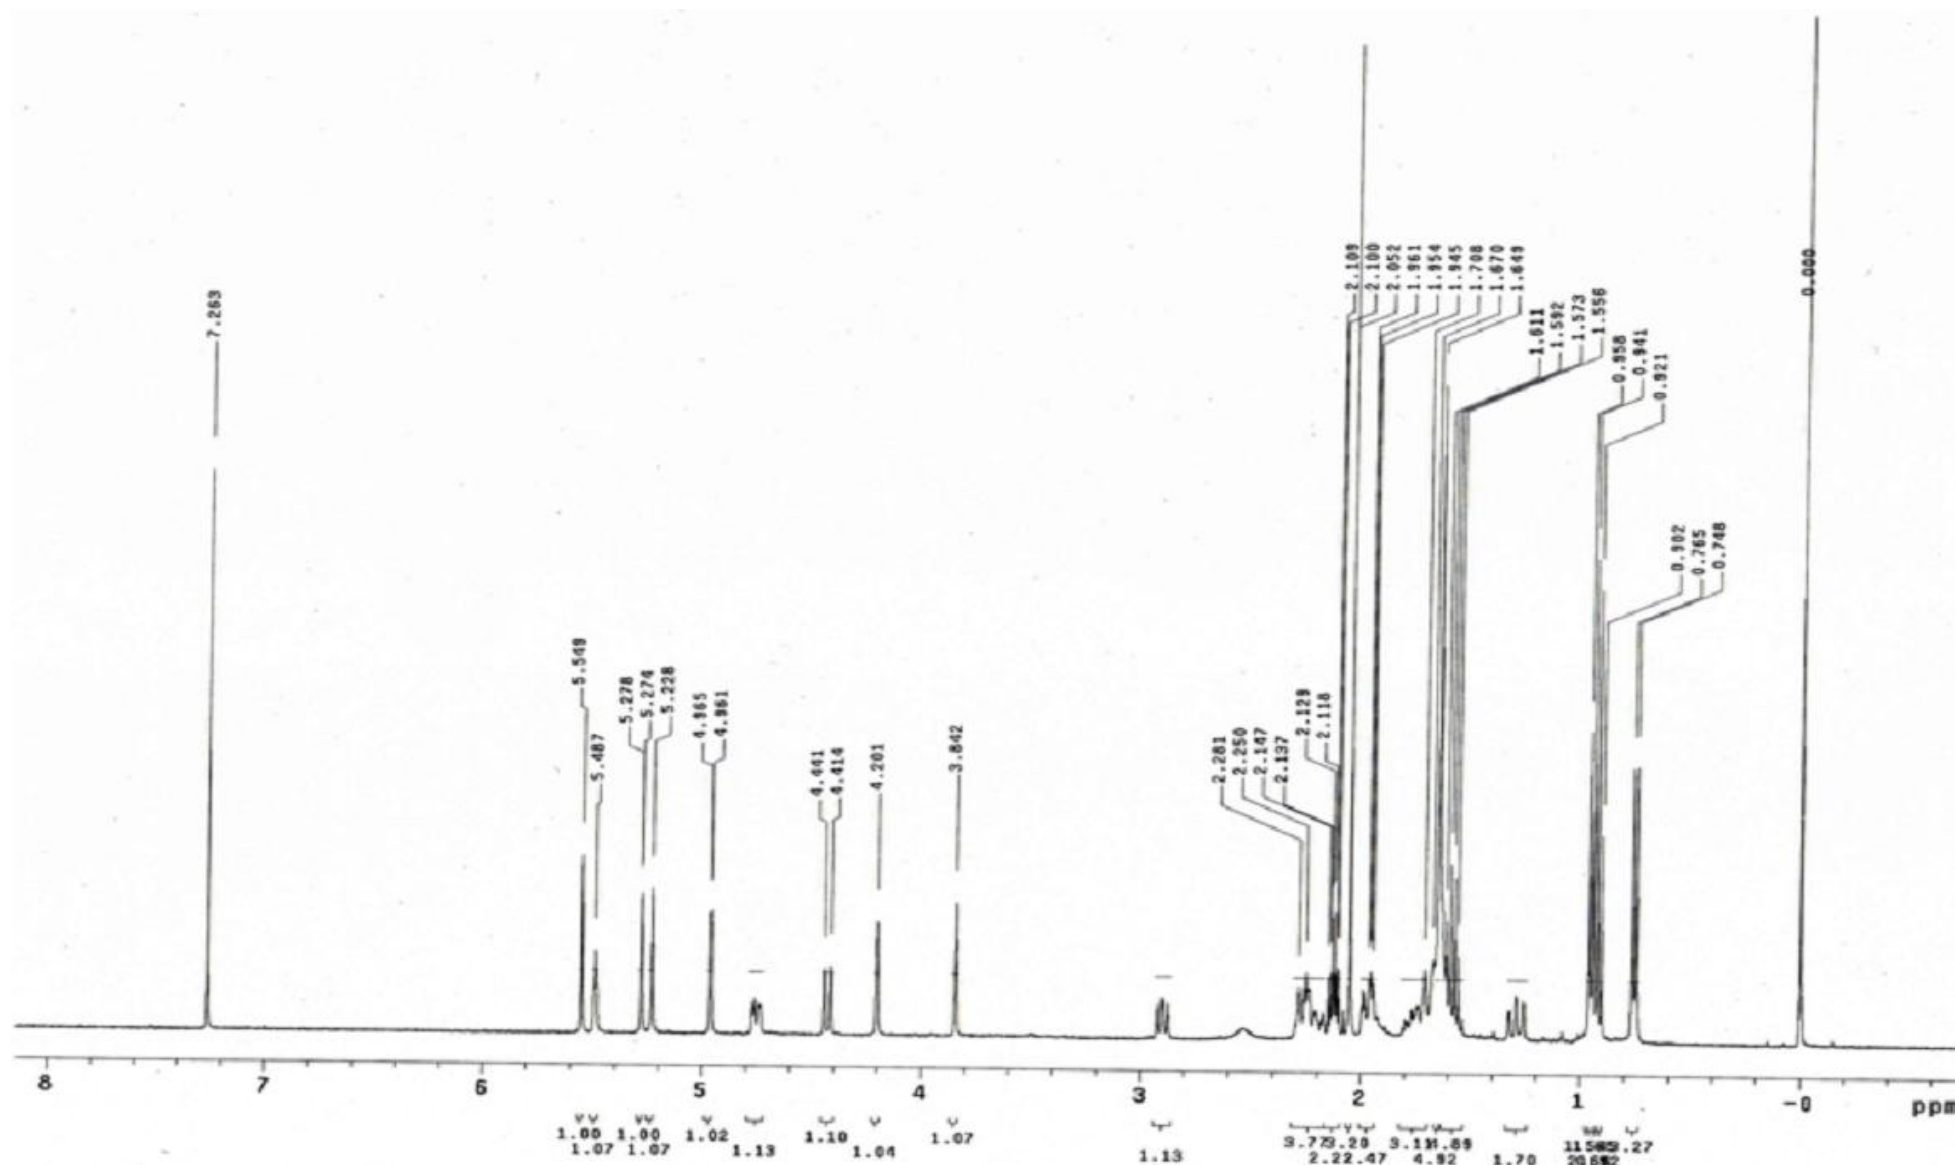

**Figure S8.**  $^{13}\text{C}$  NMR spectrum of **3** in  $\text{CDCl}_3$  at 100 MHz.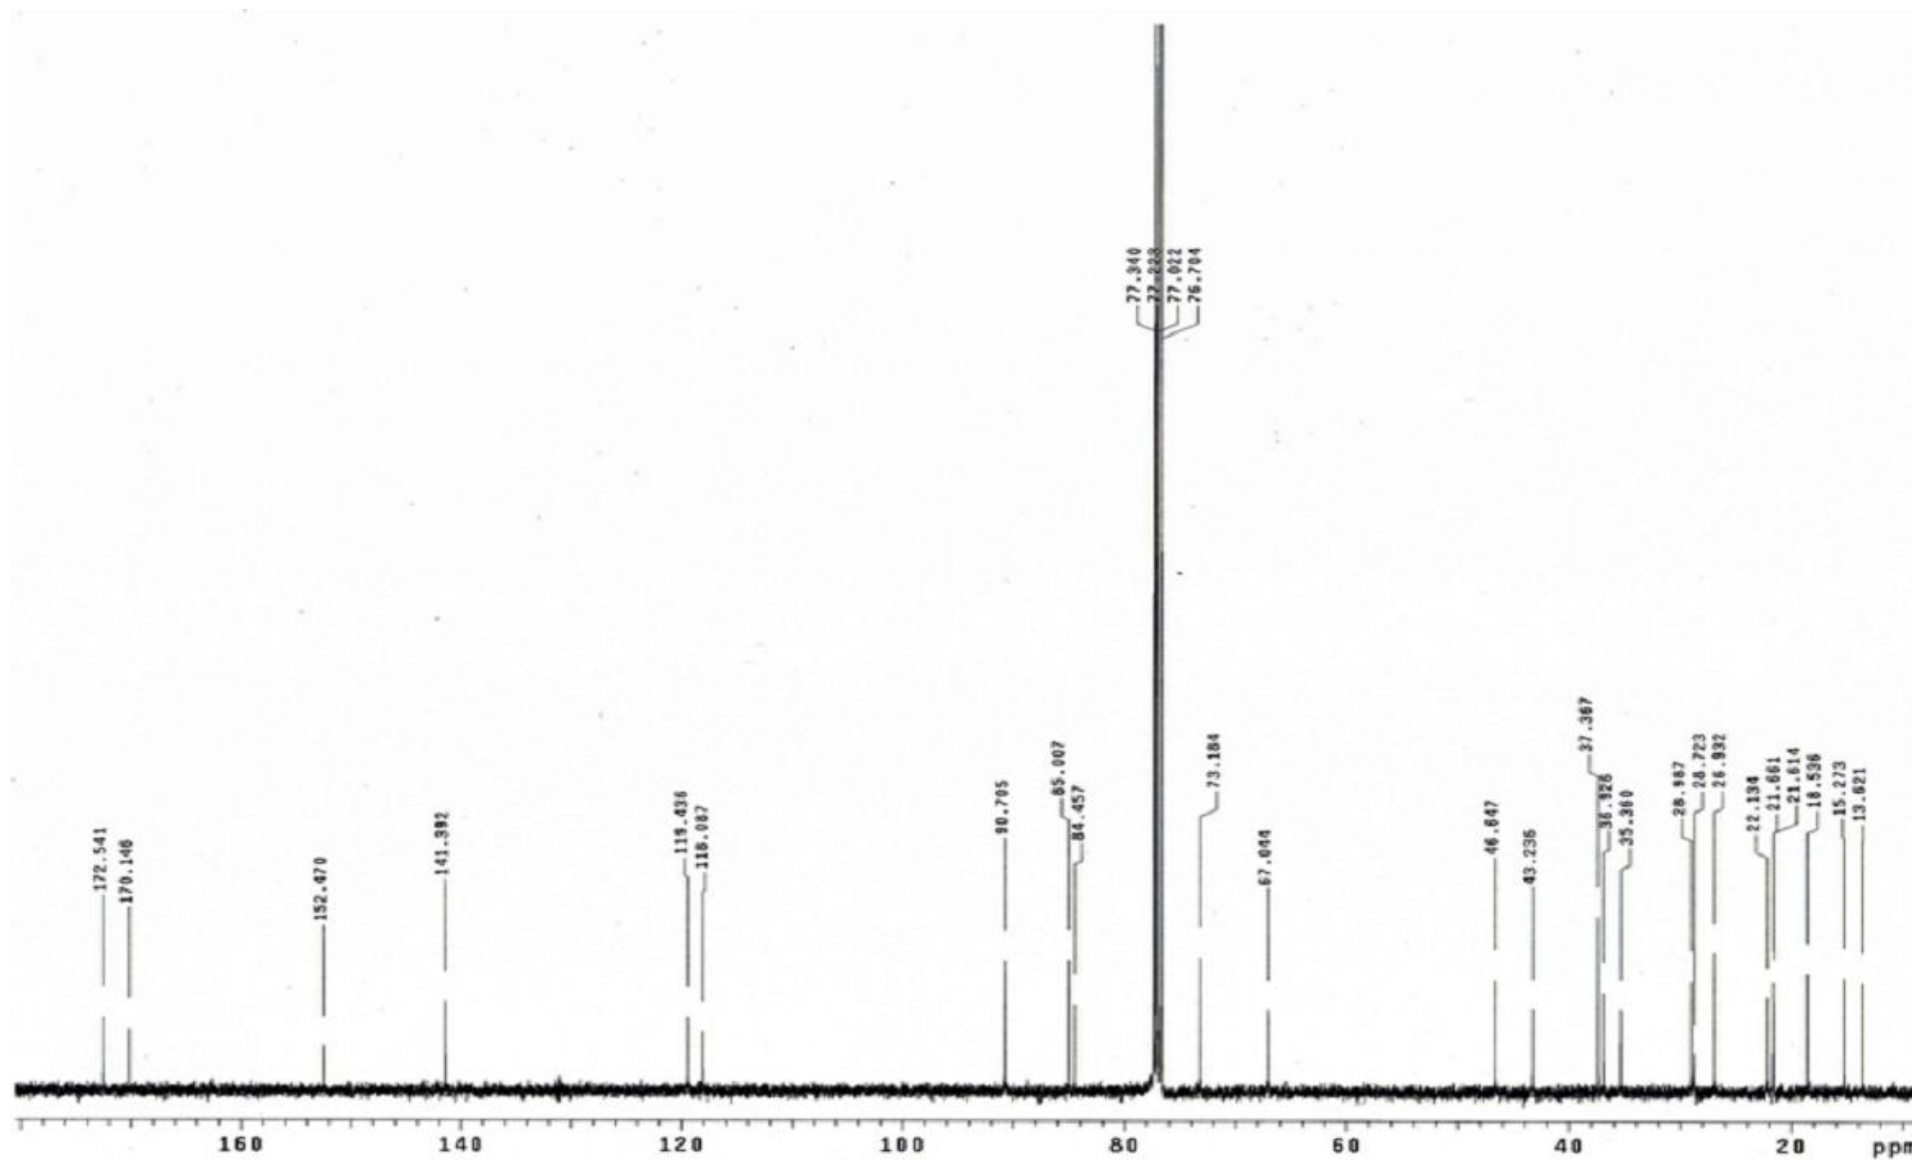

**Figure S9.** HRESIMS spectrum of **3**.

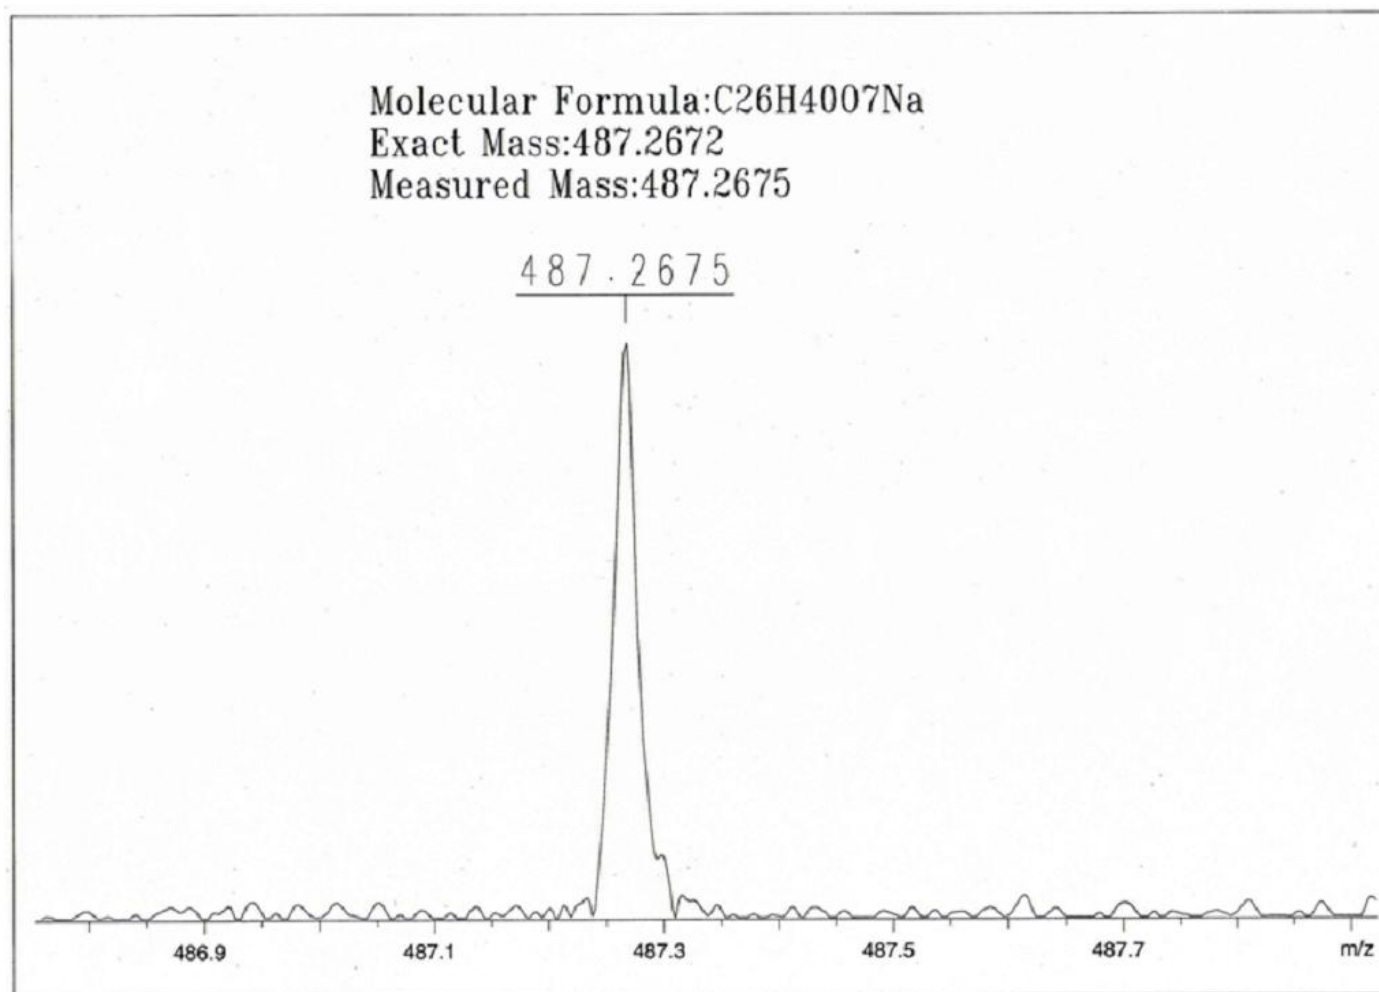

Supplement: Supplementary File 1 — Supplementary Information (PDF, 464 KB) [file marinedrugs-12-01148-s001.pdf]
